# Supplementary material for: Self-Assembly of Supramolecular Architectures Driven by σ-Hole Interactions: A Halogen-Bonded 2D Network Based on a Diiminedibromido Gold(III) Complex and Tribromide Building Blocks
Source: MDPI journal article supplement (doi:10.3390/molecules27196289), 2022-09-23
Supplement: s1 [file s1]

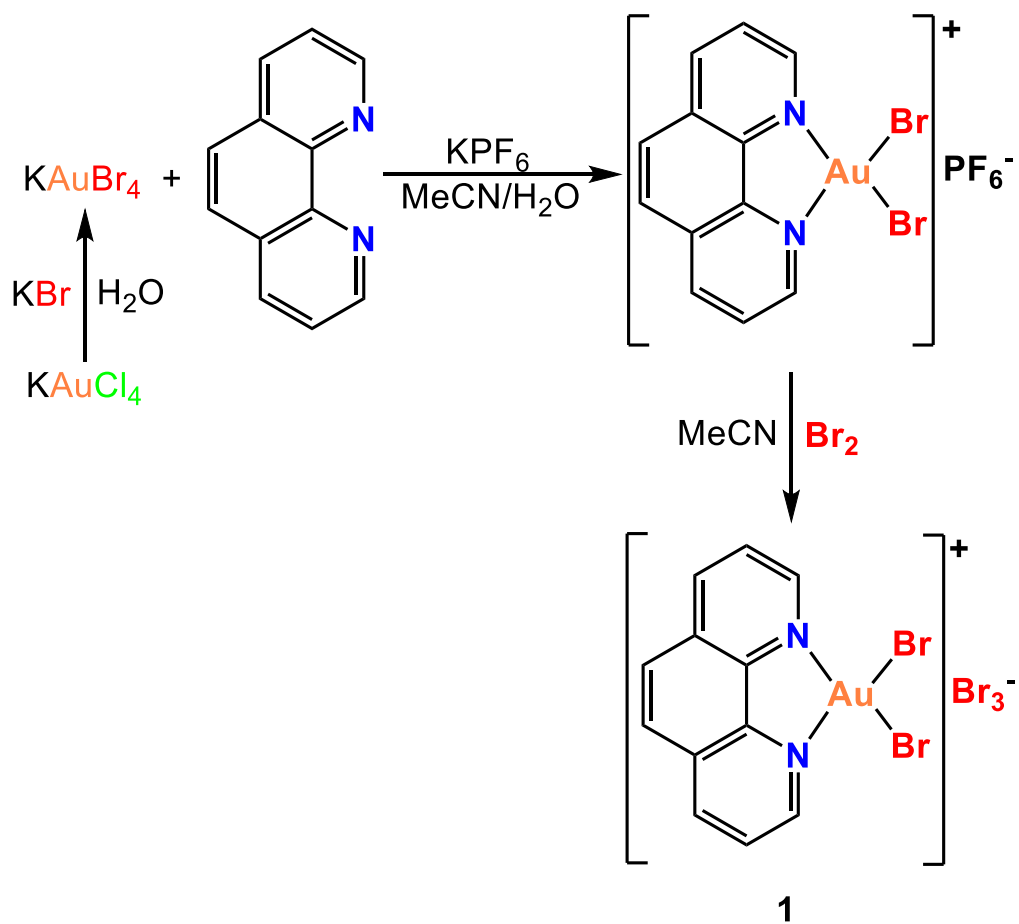

**Scheme S1.** Reaction scheme for the synthesis of  $\{[\text{Au}(\text{phen})\text{Br}_2](\text{Br}_3)\}_\infty$  (compound **1**).

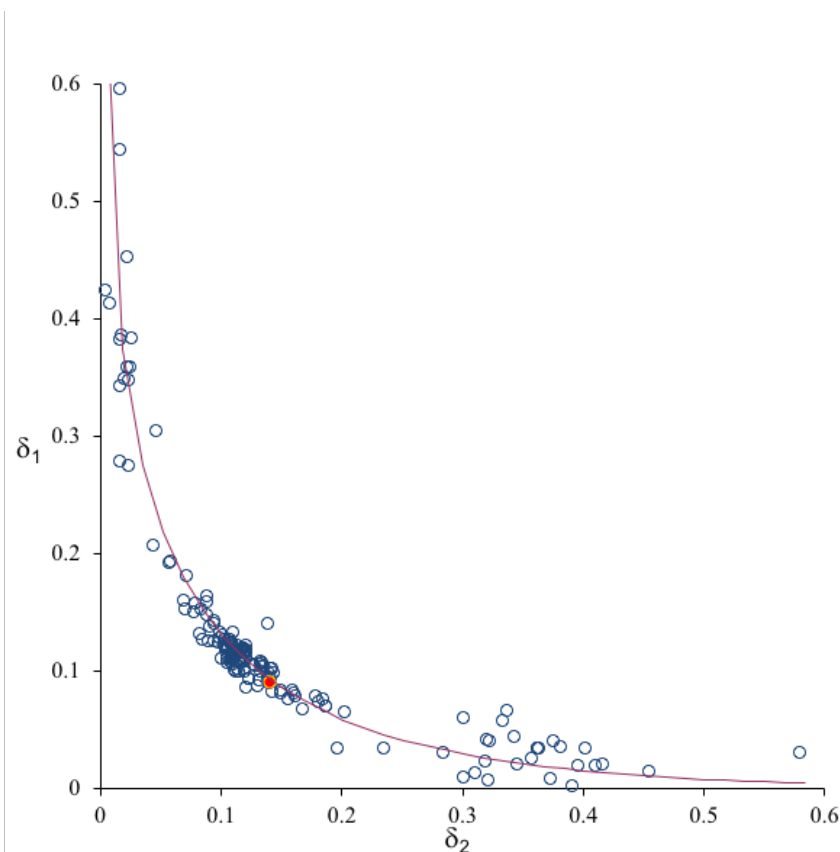

**Figure S1.** Structural data of linear Br1–Br2–Br3 fragments deposited at the CSD reported as scatter plot of  $\delta_1$  vs.  $\delta_2$ , where  $\delta_1 = \delta(\text{Br1–Br2})$  and  $\delta_2 = \delta(\text{Br2–Br3})$ . Structural data were taken from M. C. Aragoni et al., *Cryst. Growth Des.* 2012, **12**, 2769–2779. The red dot represents the data for the tribromide anion reported in this work. The solid curve represents the least-squares fit of all data according to the following equation:

$$\delta_1 = -k \cdot \ln \left[ 1 - e^{-\frac{\delta_2}{k}} \right]$$

Fitted parameter:  $k = 0.164$ , RMSD = 0.029, normalized RMSD = 0.048; for all data:  $k = 0.158$ ; RMSD = 0.046; normalized RMSD = 0.061.

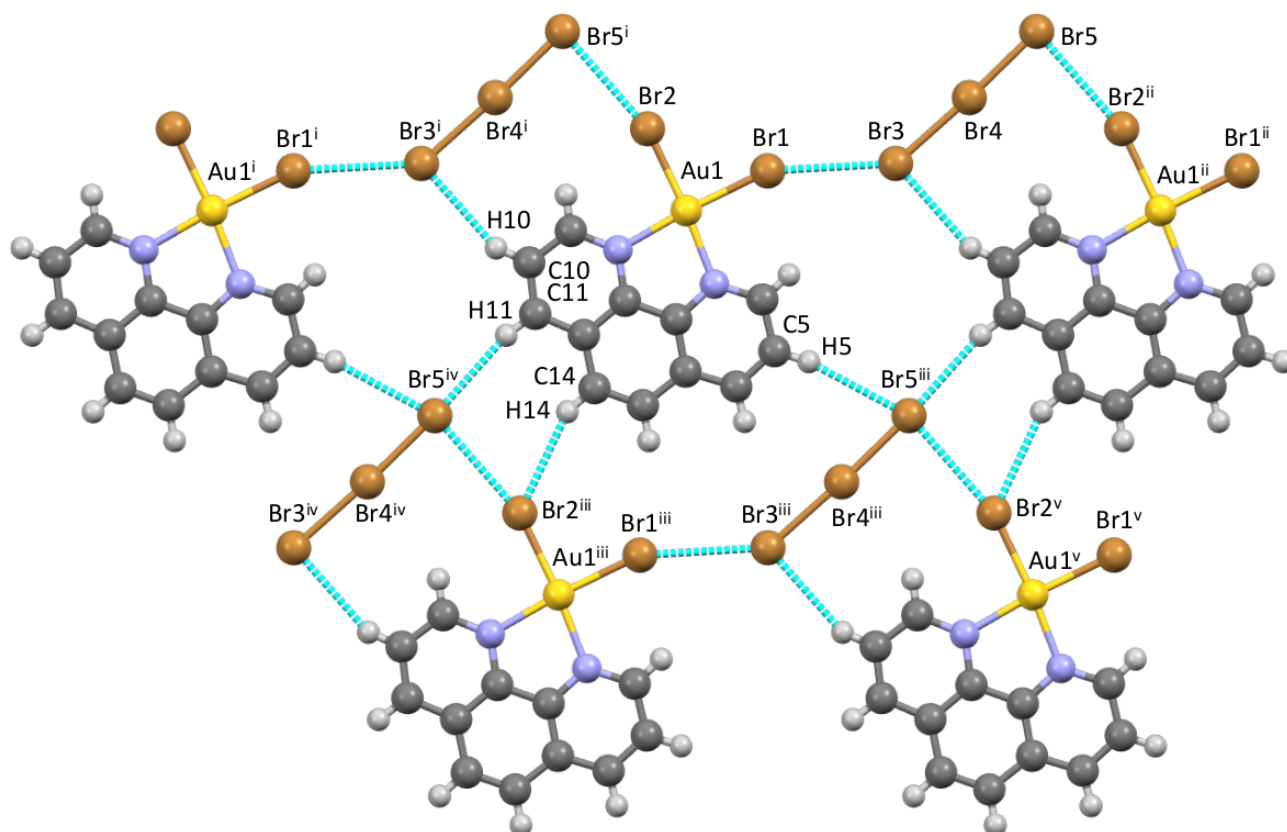

**Figure S2.** C–H $\cdots$ Br and Br $\cdots$ Br interactions forming a 2D-network laying on plane *ac* in compound **1**: C10–H10 $\cdots$ Br3<sup>i</sup>, 2.972 (C10 $\cdots$ Br3<sup>i</sup>, 3.852); C11–H11 $\cdots$ Br5<sup>iv</sup>, 2.830 (C11 $\cdots$ Br5<sup>iv</sup> 3.765); C14–H14 $\cdots$ Br2<sup>iii</sup>, 2.942 (C14 $\cdots$ Br2<sup>iii</sup>, 3.830); C5–H5 $\cdots$ Br5<sup>iii</sup>, 2.997(C5  $\cdots$ Br5<sup>iii</sup>, 3.933) Å. Symmetry operations: <sup>i</sup> = *x*, *y*, 1–*z*; <sup>ii</sup> = *x*, *y*, 1+*z*; <sup>iii</sup> = 1+*x*, *y*, *z*; <sup>iv</sup> = 1+*x*, *y*, –1+*z*; <sup>v</sup> = 1+*x*, *y*, 1+*z*.

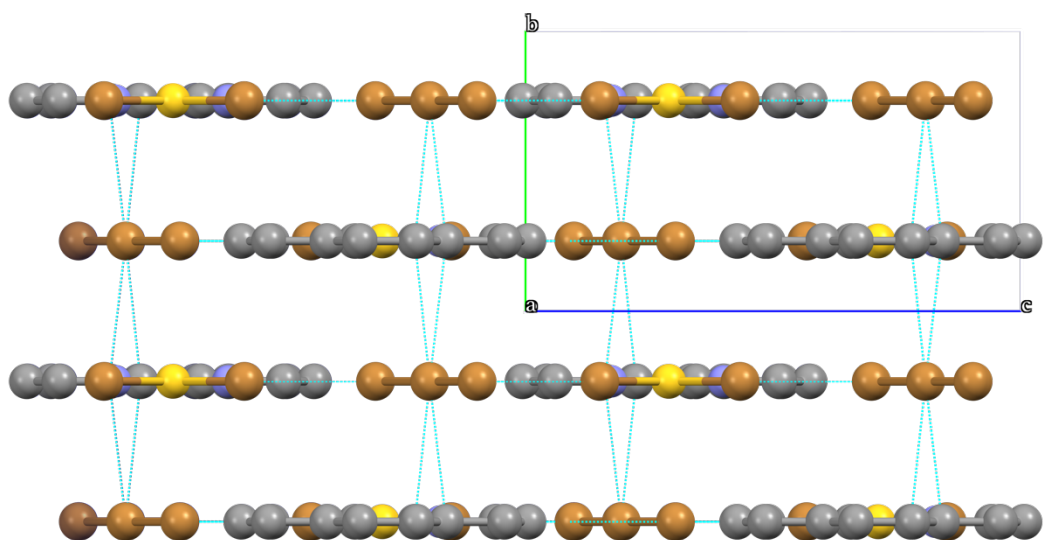

**Figure S3.** Portion of the crystal packing of compound **1** seen along the *a* axis: C7 $\cdots$ Br4<sup>vi</sup>, 3.430; C12 $\cdots$ Br4<sup>vi</sup>, 3.418 Å; <sup>vi</sup> = 1-*x*, -1/2+*y*, 1-*z*; sum of C and Br vdW radii 3.60 Å.

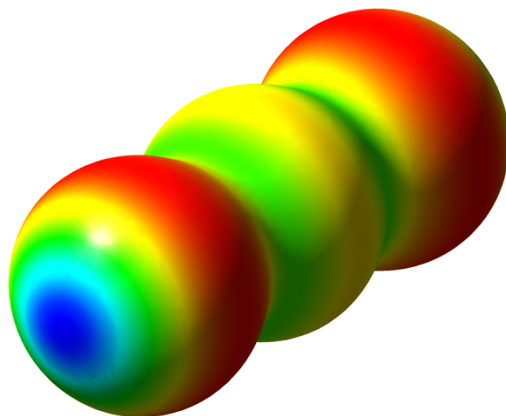

**Figure S4.** Potential electrostatic energy map [range -0.172 (red) – 0.120 (blue) a.u.] calculated for the tribromide anion at DFT level on the density map (electron density =  $9.0 \cdot 10^{-3}$  |e|/Bohr<sup>3</sup>).

Type I XB

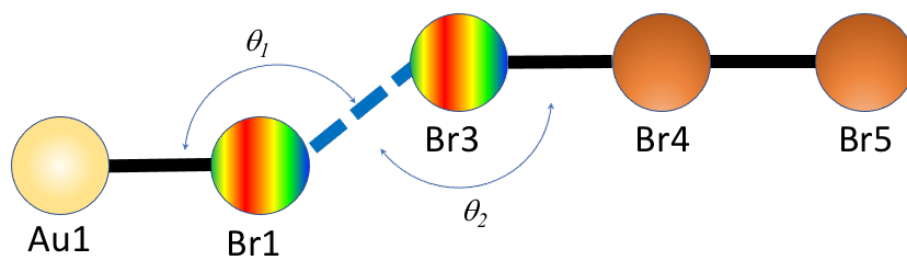

Type II XB

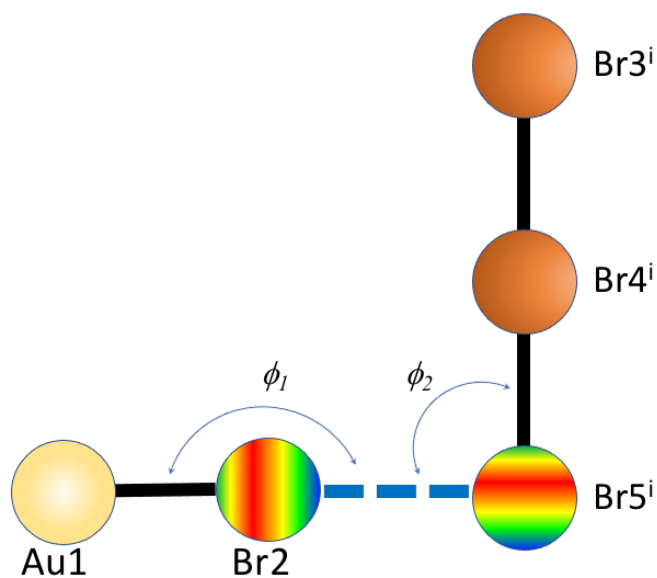

**Figure S5.** Schematic representation of type-I (top) and type-II (bottom) XB interactions in compound **1** in terms of electrostatic potential (red = negative potential; blue = positive potential).  $\theta_1 = 157.4^\circ$ ,  $\theta_2 = 141.5^\circ$ ,  $\phi_1 = 164.2^\circ$ ,  $\phi_2 = 86.7^\circ$ .

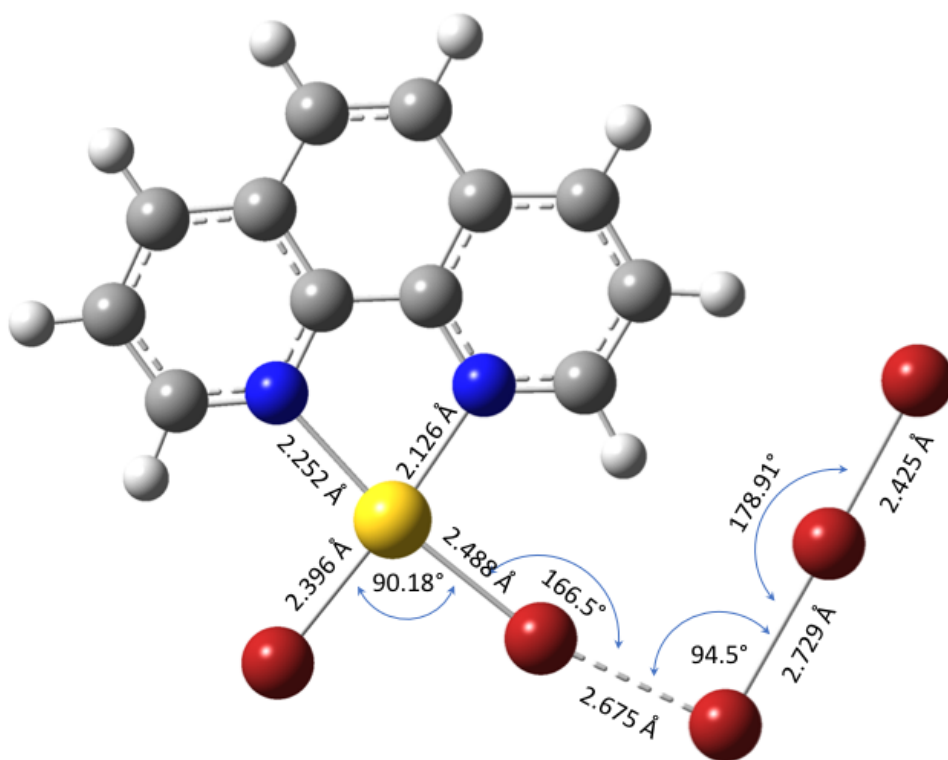

**Figure S6.** [Au(phen)Br<sub>2</sub>](Br<sub>3</sub>) model adduct with selected bond lengths and angles optimized at DFT level.

**Table S1.** Crystal data and refinement parameters for compound **1**.

|                                  |                                                                 |
|----------------------------------|-----------------------------------------------------------------|
| Formula                          | C <sub>12</sub> H <sub>8</sub> AuBr <sub>5</sub> N <sub>2</sub> |
| $D_{calc.}/\text{g cm}^{-3}$     | 3.046                                                           |
| $m/\text{mm}^{-1}$               | 20.542                                                          |
| Formula Weight                   | 776.70                                                          |
| Colour                           | yellow                                                          |
| Shape                            | platelet-shaped                                                 |
| Size/mm <sup>3</sup>             | 0.05×0.02×0.01                                                  |
| $T/\text{K}$                     | 93                                                              |
| Crystal System                   | monoclinic                                                      |
| Space Group                      | $P2_1/m$                                                        |
| $a/\text{\AA}$                   | 10.657(2)                                                       |
| $b/\text{\AA}$                   | 6.7010(12)                                                      |
| $c/\text{\AA}$                   | 12.495(3)                                                       |
| $\alpha/^\circ$                  | 90                                                              |
| $\beta/^\circ$                   | 108.404(4)                                                      |
| $\gamma/^\circ$                  | 90                                                              |
| $V/\text{\AA}^3$                 | 846.7(3)                                                        |
| $Z$                              | 2                                                               |
| $Z'$                             | 0.5                                                             |
| Wavelength/ $\text{\AA}$         | 0.71075                                                         |
| Radiation type                   | Mo K $\alpha$                                                   |
| $\Theta_{min}/^\circ$            | 1.718                                                           |
| $\Theta_{max}/^\circ$            | 25.357                                                          |
| Measured Reflections.            | 25164                                                           |
| Independent Reflections          | 1682                                                            |
| Reflections $I \geq 2 \sigma(I)$ | 1492                                                            |
| $R_{int}$                        | 0.0941                                                          |
| Parameters                       | 121                                                             |
| Restraints                       | 0                                                               |
| Largest Peak                     | 0.91                                                            |
| Deepest Hole                     | -0.89                                                           |
| GooF                             | 0.927                                                           |
| $wR_2$ (all data)                | 0.0408                                                          |
| $wR_2$                           | 0.0406                                                          |
| $R_1$ (all data)                 | 0.0215                                                          |
| $R_1$                            | 0.0197                                                          |

**Table S2.** Bond Lengths in Å for compound **1**.

|         |           |
|---------|-----------|
| Au1–N8  | 2.077(4)  |
| Au1–N1  | 2.074(4)  |
| Au1–Br2 | 2.3825(7) |
| Au1–Br1 | 2.3853(8) |
| Br3–Br4 | 2.6022(9) |
| Br4–Br5 | 2.4871(9) |
| N1–C6   | 1.326(7)  |
| N1–C2   | 1.369(7)  |
| N8–C9   | 1.338(7)  |
| N8–C7   | 1.352(7)  |
| C2–C3   | 1.395(8)  |
| C2–C7   | 1.436(8)  |
| C3–C4   | 1.392(9)  |
| C3–C13  | 1.434(10) |
| C4–C5   | 1.367(10) |
| C5–C6   | 1.397(9)  |
| C7–C12  | 1.407(8)  |
| C9–C10  | 1.373(9)  |
| C10–C11 | 1.364(9)  |
| C11–C12 | 1.398(9)  |
| C12–C14 | 1.430(9)  |
| C13–C14 | 1.350(10) |



**Table S3.** Bond Angles in ° for compound **1**.

|             |            |
|-------------|------------|
| N8–Au1–N1   | 81.11(18)  |
| N8–Au1–Br2  | 94.49(13)  |
| N1–Au1–Br2  | 175.59(13) |
| N8–Au1–Br1  | 176.06(13) |
| N1–Au1–Br1  | 94.96(13)  |
| Br2–Au1–Br1 | 89.45(3)   |
| Br5–Au1–Br3 | 177.32(3)  |
| C6–N1–C2    | 119.7(5)   |
| C6–N1–Au1   | 128.7(4)   |
| C2–N1–Au1   | 111.6(4)   |
| C9–N8–C7    | 119.8(5)   |
| C9–N8–Au1   | 128.2(4)   |
| C7–N8–Au1   | 112.0(4)   |
| N1–C2–C3    | 122.4(5)   |
| N1–C2–C7    | 117.5(5)   |
| C3–C2–C7    | 120.0(5)   |
| C2–C3–C4    | 116.6(6)   |
| C2–C3–C13   | 118.1(6)   |
| C4–C3–C13   | 125.3(6)   |
| C5–C4–C3    | 120.8(6)   |
| C4–C5–C6    | 119.7(6)   |
| N1–C6–C5    | 120.8(6)   |
| N8–C7–C12   | 121.7(5)   |
| N8–C7–C2    | 117.8(5)   |
| C12–C7–C2   | 120.5(5)   |
| N8–C9–C10   | 121.0(6)   |
| C9–C10–C11  | 120.5(6)   |
| C10–C11–C12 | 119.9(6)   |
| C11–C12–C7  | 117.0(6)   |
| C11–C12–C14 | 124.6(6)   |
| C7–C12–C14  | 118.4(6)   |
| C14–C13–C3  | 122.4(6)   |
| C13–C14–C12 | 120.7(6)   |

**Table S4.** Orthogonal Cartesian coordinates for the cation  $[\text{Au}(\text{phen})\text{Br}_2]^+$  at the DFT-optimized geometry.

| Center<br>Number | Atomic<br>Number | Coordinates (Å) |          |           |
|------------------|------------------|-----------------|----------|-----------|
|                  |                  | X               | Y        | Z         |
| 1                | 79               | 4.222095        | 5.025750 | 3.422568  |
| 2                | 35               | 2.557442        | 5.025750 | 5.133540  |
| 3                | 35               | 2.473822        | 5.025750 | 1.797143  |
| 4                | 7                | 5.853772        | 5.025750 | 4.724570  |
| 5                | 7                | 5.786264        | 5.025750 | 2.040289  |
| 6                | 6                | 7.035443        | 5.025750 | 4.061582  |
| 7                | 6                | 8.264026        | 5.025750 | 4.735484  |
| 8                | 6                | 8.225044        | 5.025750 | 6.141241  |
| 9                | 1                | 9.152320        | 5.025750 | 6.703301  |
| 10               | 6                | 7.015043        | 5.025750 | 6.787921  |
| 11               | 1                | 6.952382        | 5.025750 | 7.868270  |
| 12               | 6                | 5.832169        | 5.025750 | 6.043881  |
| 13               | 1                | 4.853394        | 5.025750 | 6.510656  |
| 14               | 6                | 6.999651        | 5.025750 | 2.642988  |
| 15               | 6                | 5.698184        | 5.025750 | 0.723660  |
| 16               | 1                | 4.697115        | 5.025750 | 0.306862  |
| 17               | 6                | 6.842027        | 5.025750 | -0.078786 |
| 18               | 1                | 6.725229        | 5.025750 | -1.154630 |
| 19               | 6                | 8.083140        | 5.025750 | 0.506240  |
| 20               | 1                | 8.980847        | 5.025750 | -0.101942 |
| 21               | 6                | 8.192900        | 5.025750 | 1.908165  |
| 22               | 6                | 9.467667        | 5.025750 | 3.968641  |
| 23               | 1                | 10.415315       | 5.025750 | 4.494353  |
| 24               | 6                | 9.433570        | 5.025750 | 2.613612  |
| 25               | 1                | 10.353626       | 5.025750 | 2.040942  |

**Table S5.** Summary of Natural Population Analysis for the cation [Au(phen)Br<sub>2</sub>]<sup>+</sup> at the DFT-optimized geometry.

| Atom | No | Natural Population   |          |          |         |          |
|------|----|----------------------|----------|----------|---------|----------|
|      |    | Natural Charge ( e ) | Core     | Valence  | Rydberg | Total    |
| Au   | 1  | 0.51790              | 67.99445 | 10.45333 | 0.03432 | 78.48210 |
| Br   | 2  | -0.11758             | 27.99894 | 7.10245  | 0.01619 | 35.11758 |
| Br   | 3  | -0.11754             | 27.99894 | 7.10241  | 0.01619 | 35.11754 |
| N    | 4  | -0.38075             | 1.99920  | 5.34083  | 0.04072 | 7.38075  |
| N    | 5  | -0.38075             | 1.99920  | 5.34083  | 0.04072 | 7.38075  |
| C    | 6  | 0.15886              | 1.99899  | 3.82040  | 0.02176 | 5.84114  |
| C    | 7  | -0.06644             | 1.99906  | 4.04960  | 0.01778 | 6.06644  |
| C    | 8  | -0.08907             | 1.99914  | 4.07213  | 0.01780 | 6.08907  |
| H    | 9  | 0.24829              | 0.00000  | 0.75047  | 0.00124 | 0.75171  |
| C    | 10 | -0.22250             | 1.99919  | 4.20558  | 0.01774 | 6.22250  |
| H    | 11 | 0.25923              | 0.00000  | 0.73976  | 0.00100 | 0.74077  |
| C    | 12 | 0.10099              | 1.99926  | 3.87820  | 0.02155 | 5.89901  |
| H    | 13 | 0.25812              | 0.00000  | 0.74061  | 0.00127 | 0.74188  |
| C    | 14 | 0.15893              | 1.99899  | 3.82033  | 0.02176 | 5.84107  |
| C    | 15 | 0.10090              | 1.99926  | 3.87828  | 0.02155 | 5.89910  |
| H    | 16 | 0.25814              | 0.00000  | 0.74059  | 0.00127 | 0.74186  |
| C    | 17 | -0.22251             | 1.99919  | 4.20559  | 0.01774 | 6.22251  |
| H    | 18 | 0.25923              | 0.00000  | 0.73977  | 0.00100 | 0.74077  |
| C    | 19 | -0.08903             | 1.99914  | 4.07209  | 0.01780 | 6.08903  |
| H    | 20 | 0.24829              | 0.00000  | 0.75047  | 0.00124 | 0.75171  |
| C    | 21 | -0.06646             | 1.99906  | 4.04962  | 0.01778 | 6.06646  |
| C    | 22 | -0.15472             | 1.99915  | 4.13851  | 0.01706 | 6.15472  |
| H    | 23 | 0.24657              | 0.00000  | 0.75229  | 0.00114 | 0.75343  |
| C    | 24 | -0.15469             | 1.99915  | 4.13848  | 0.01706 | 6.15469  |
| H    | 25 | 0.24658              | 0.00000  | 0.75229  | 0.00114 | 0.75342  |

**Table S6.** Orthogonal Cartesian coordinates for neutral adduct [Au(phen)Br<sub>2</sub>](Br<sub>3</sub>) at the DFT-optimized geometry.

| Center<br>Number | Atomic<br>Number | Coordinates (Angstroms) |           |           |
|------------------|------------------|-------------------------|-----------|-----------|
|                  |                  | X                       | Y         | Z         |
| 1                | 6                | -0.004145               | -0.005449 | 0.010035  |
| 2                | 6                | 0.008028                | 0.018620  | 1.437305  |
| 3                | 6                | 1.238297                | 0.021602  | 2.113151  |
| 4                | 6                | 2.454865                | 0.000495  | 1.359221  |
| 5                | 6                | 2.411598                | -0.023032 | -0.045478 |
| 6                | 6                | 1.146668                | -0.025464 | -0.703372 |
| 7                | 6                | 3.642977                | -0.043021 | -0.722512 |
| 8                | 6                | 4.815217                | -0.038996 | -0.009474 |
| 9                | 6                | 4.760897                | -0.014850 | 1.388732  |
| 10               | 7                | 3.616863                | 0.003994  | 2.034455  |
| 11               | 6                | -1.163183               | 0.039794  | 2.214719  |
| 12               | 6                | -1.070261               | 0.062250  | 3.580744  |
| 13               | 6                | 0.195110                | 0.063664  | 4.176761  |
| 14               | 7                | 1.306229                | 0.044005  | 3.466025  |
| 15               | 79               | 3.278201                | 0.043730  | 4.260076  |
| 16               | 35               | 2.529843                | 0.088800  | 6.632508  |
| 17               | 35               | 5.565521                | 0.039905  | 4.973827  |
| 18               | 35               | 1.153680                | 0.137057  | 8.925340  |
| 19               | 35               | -1.290257               | 0.137716  | 7.710831  |
| 20               | 35               | -3.440985               | 0.137519  | 6.590390  |
| 21               | 1                | 3.653897                | -0.061508 | -1.806905 |
| 22               | 1                | 5.776824                | -0.054074 | -0.506085 |
| 23               | 1                | 5.655565                | -0.010498 | 2.004999  |
| 24               | 1                | 0.303899                | 0.081243  | 5.256844  |
| 25               | 1                | -1.943723               | 0.079154  | 4.223531  |
| 26               | 1                | -2.130277               | 0.038127  | 1.723679  |
| 27               | 1                | 1.124174                | -0.043661 | -1.787056 |
| 28               | 1                | -0.964078               | -0.007357 | -0.493730 |

**Table S7.** Summary of Natural Population Analysis for the cation [Au(phen)Br<sub>2</sub>](Br<sub>3</sub>) at the DFT-optimized geometry.

| Atom | No | Natural Population |          |          |         |          |
|------|----|--------------------|----------|----------|---------|----------|
|      |    | Natural Charge     | Core     | Valence  | Rydberg | Total    |
| C    | 1  | -0.16407           | 1.99915  | 4.14755  | 0.01737 | 6.16407  |
| C    | 2  | -0.08016           | 1.99906  | 4.06239  | 0.01870 | 6.08016  |
| C    | 3  | 0.16183            | 1.99899  | 3.81719  | 0.02198 | 5.83817  |
| C    | 4  | 0.16174            | 1.99900  | 3.81713  | 0.02212 | 5.83826  |
| C    | 5  | -0.07911           | 1.99906  | 4.06131  | 0.01874 | 6.07911  |
| C    | 6  | -0.17330           | 1.99914  | 4.15676  | 0.01740 | 6.17330  |
| C    | 7  | -0.12046           | 1.99914  | 4.10343  | 0.01789 | 6.12046  |
| C    | 8  | -0.23588           | 1.99918  | 4.21849  | 0.01820 | 6.23588  |
| C    | 9  | 0.08485            | 1.99927  | 3.89344  | 0.02244 | 5.91515  |
| N    | 10 | -0.40070           | 1.99929  | 5.36067  | 0.04074 | 7.40070  |
| C    | 11 | -0.11351           | 1.99913  | 4.09628  | 0.01809 | 6.11351  |
| C    | 12 | -0.22673           | 1.99917  | 4.20877  | 0.01879 | 6.22673  |
| C    | 13 | 0.09540            | 1.99926  | 3.88329  | 0.02205 | 5.90460  |
| N    | 14 | -0.40597           | 1.99923  | 5.36689  | 0.03986 | 7.40597  |
| Au   | 15 | 0.44632            | 67.99516 | 10.53869 | 0.01983 | 78.55368 |
| Br   | 16 | -0.08770           | 27.99932 | 7.06747  | 0.02091 | 35.08770 |
| Br   | 17 | -0.28958           | 27.99905 | 7.27537  | 0.01516 | 35.28958 |
| Br   | 18 | -0.21420           | 27.99991 | 7.19988  | 0.01442 | 35.21420 |
| Br   | 19 | -0.04561           | 27.99991 | 7.01346  | 0.03223 | 35.04561 |
| Br   | 20 | -0.25577           | 27.99987 | 7.23870  | 0.01720 | 35.25577 |
| H    | 21 | 0.23117            | 0.00000  | 0.76750  | 0.00134 | 0.76883  |
| H    | 22 | 0.24049            | 0.00000  | 0.75843  | 0.00108 | 0.75951  |
| H    | 23 | 0.24146            | 0.00000  | 0.75722  | 0.00132 | 0.75854  |
| H    | 24 | 0.26290            | 0.00000  | 0.73404  | 0.00305 | 0.73710  |
| H    | 25 | 0.27172            | 0.00000  | 0.72641  | 0.00187 | 0.72828  |
| H    | 26 | 0.23291            | 0.00000  | 0.76574  | 0.00135 | 0.76709  |
| H    | 27 | 0.23036            | 0.00000  | 0.76839  | 0.00125 | 0.76964  |
| H    | 28 | 0.23160            | 0.00000  | 0.76717  | 0.00123 | 0.76840  |
